# Supplementary material for: Incorporation of Fused Remote Sensing Imagery to Enhance Soil Organic Carbon Spatial Prediction in an Agricultural Area in Yellow River Basin, China
Source: MDPI journal article supplement (doi:10.3390/rs15082017), 2023-04-11
Supplement: s1 [file s1]

**Table**

Table S1 Assembled environmental variables in the study area.

| Variable                                                                                                                                                                                                                                                                                                                                                                                                                                                                                                                                                                                                                          | References        |
|-----------------------------------------------------------------------------------------------------------------------------------------------------------------------------------------------------------------------------------------------------------------------------------------------------------------------------------------------------------------------------------------------------------------------------------------------------------------------------------------------------------------------------------------------------------------------------------------------------------------------------------|-------------------|
| <b>Spectral reflectances</b>                                                                                                                                                                                                                                                                                                                                                                                                                                                                                                                                                                                                      |                   |
| Coastal aerosol band (Coastal), Blue band (Blue), Green band (Green), Red band (Red), Red edge band 1 (RE1), Red edge band 2 (RE2), Red edge band 3 (RE3), Near Infrared band (NIR), Red edge band 4 (RE4), Water vapor band (W), Short Wavelength band 1 (SW1), Short Wavelength band 2 (SW2)                                                                                                                                                                                                                                                                                                                                    |                   |
| <b>Band ratios</b>                                                                                                                                                                                                                                                                                                                                                                                                                                                                                                                                                                                                                |                   |
| Green/Blue (GB), Red/Blue (RB), Red/Green (RG), NIR/Blue (NB), NIR/Green (NG), NIR/Red (NR), SW1/Blue (S1B), SW1/Green (S1G), SW1/Red (S1R), SW1/NIR (S1N), SW2/Blue (S2B), SW2/Green (S2G), SW2/Red (S2R), SW2/NIR (S2N), SW2/SW1 (S2S1), RE1/Blue (RE1B), RE1/Green (RE1G), RE1/Red (RE1R), RE2/Blue (RE2B), RE2/Green (RE2G), RE2/Red (RE2R), RE2/RE1 (RE2RE1), RE3/Blue (RE3B), RE3/Green (RE3G), RE3/Red (RE3R), RE3/RE1 (RE3RE1), RE3/RE2 (RE3RE2), NIR/RE1 (NRE1), NIR/RE2 (NRE2), NIR/RE3 (NRE3), RE4/Blue (RE4B), RE4/Green (RE4G), RE4/Red (RE4R), RE4/RE1 (RE4RE1), RE4/RE2 (RE4RE2), RE4/NIR (RE4N), RE4/RE3 (RE4RE3) |                   |
| <b>Red band-based vegetation indices</b>                                                                                                                                                                                                                                                                                                                                                                                                                                                                                                                                                                                          |                   |
| Normalized Difference Vegetation Index (NDVI), Normalized Difference Green Index (NDVIg), Simple Ratio (SR), Transformed Spectral Index (TVI), Green Chlorophyll Index (CIg), Soil Adjusted Vegetation Index (SAVI), Atmospherically Resistant Vegetation Index (ARVI),                                                                                                                                                                                                                                                                                                                                                           | [1], [2]          |
| <b>Red edge band-based vegetation indices</b>                                                                                                                                                                                                                                                                                                                                                                                                                                                                                                                                                                                     |                   |
| Renormalized Normalized Difference Vegetation Index (RNDVI), Sentinel-2 Red-Edge Position (S2REP), MERIS Terrestrial Chlorophyll Index (MTCI), Inverted Red-Edge Chlorophyll Index (IRECI), Normalized Difference Red-edge Index (NDVIr), Red-edge Chlorophyll Index (CIr), Modified Chlorophyll Absorption in Reflectance Index (MCARI), Transformed Chlorophyll Absorption in Reflectance Index (TCARI)                                                                                                                                                                                                                         | [3] [4], [5], [6] |
| <b>Bare soil indices</b>                                                                                                                                                                                                                                                                                                                                                                                                                                                                                                                                                                                                          |                   |
| Bare soil index (BSI), Normalized Difference Soil Index (NDSI)                                                                                                                                                                                                                                                                                                                                                                                                                                                                                                                                                                    | [7]               |
| <b>Water indices</b>                                                                                                                                                                                                                                                                                                                                                                                                                                                                                                                                                                                                              |                   |
| Normalized Difference Water Index (NDWI), Moisture Stress Index (MSI), Mid-infrared Index (MidIR)                                                                                                                                                                                                                                                                                                                                                                                                                                                                                                                                 | [8], [9], [10]    |
| <b>Temperature indices</b>                                                                                                                                                                                                                                                                                                                                                                                                                                                                                                                                                                                                        |                   |
| At-satellite brightness temperature for band 10 (T1) and band 11 (T2) (Unit: K)                                                                                                                                                                                                                                                                                                                                                                                                                                                                                                                                                   |                   |
| <b>Topographic attributes</b>                                                                                                                                                                                                                                                                                                                                                                                                                                                                                                                                                                                                     |                   |
| Elevation (Elevation) (unit: m), Aspect (Aspect) (unit: Degree), Flow Accumulation (FlowAccu), Slope (Slope) (unit: Degree)                                                                                                                                                                                                                                                                                                                                                                                                                                                                                                       |                   |

### **Geographic attributes**

X coordinate (Xcoord, unit: m), Y coordinate (Ycoord, unit: m), Distance to Yellow River (DTR, unit: m), Distance to Channel (DTC, unit: m)

### **Salinity indices**

Salinity Index 1 (SI1), Salinity Index 2 (SI2), Salinity Index 3 (SI3) [11], [12]

### **Principal components of remote sensing bands**

The first principal component score (P1), The second principal component score (P2), The third principal component score (P3)

### **Crop types**

Peanut, maize, sesame, bean, grape, sweet potato, soybean, rice

### **Remote sensing images**

Landsat 8 image (LT), Brovey PAN Landsat 8 image (LTb), IHS PAN Landsat 8 image (LTi), GS PAN Landsat 8 image (LTg), Sentinel 2 image (ST), Brovey fused Sentinel 2-Landsat 8 image (STb), IHS fused Sentinel 2-Landsat 8 image (STi), GS fused Sentinel 2-Landsat 8 image (STg)

---

**Figure**

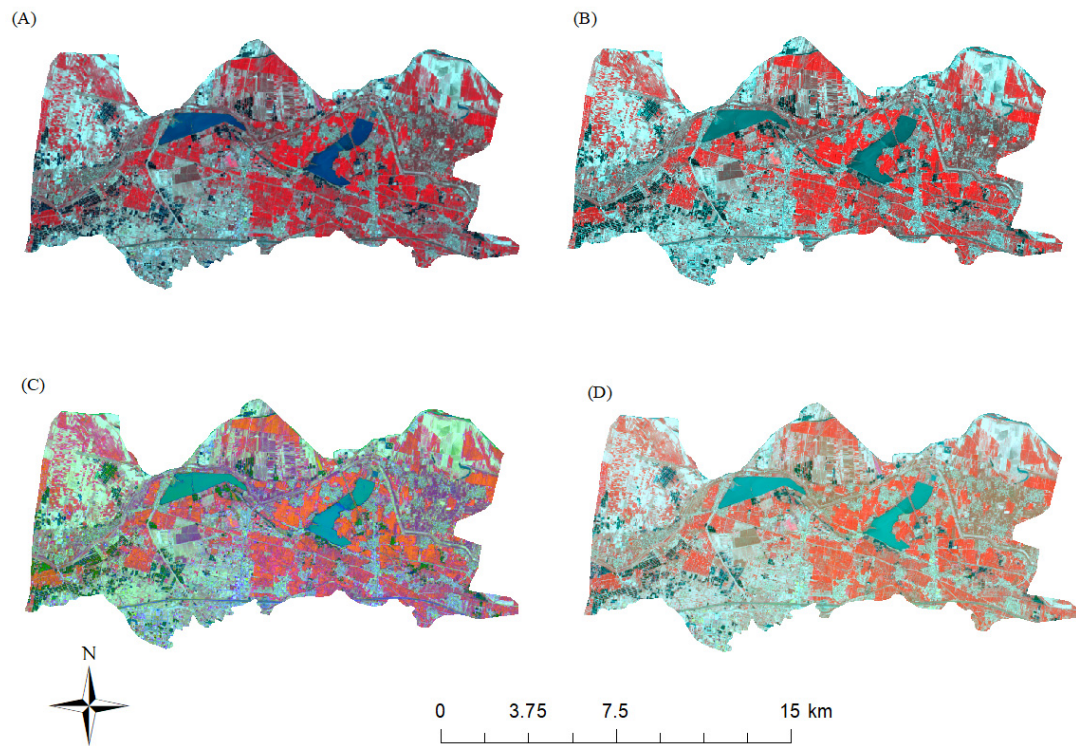

Figure S1. Remote sensing images of (A) MS Landsat 8, (B) Brovey PAN Landsat 8, (C) IHS PAN Landsat 8 and (D) GS PAN Landsat 8 images in the study area.

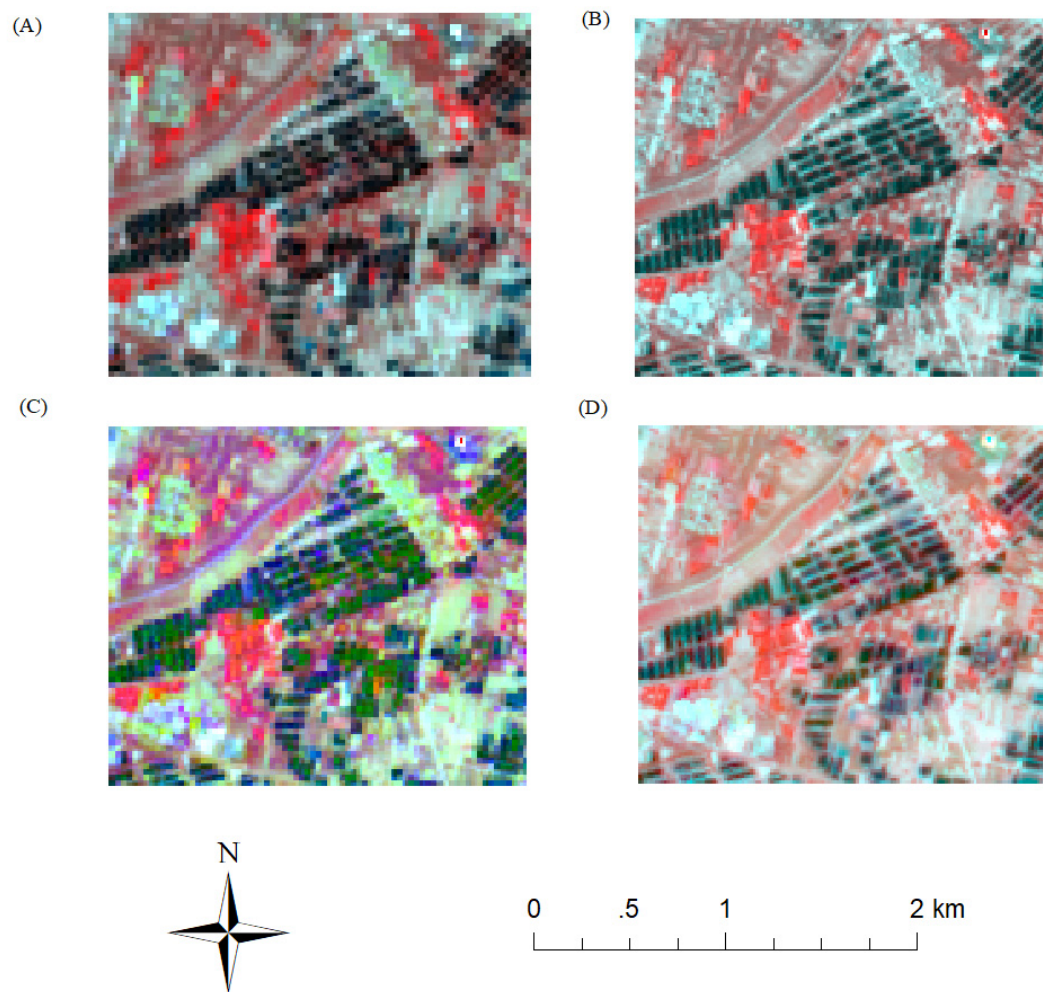

Figure S2. Remote sensing images of (A) MS Landsat 8, (B) Brovey PAN Landsat 8, (C) IHS PAN Landsat 8 and (D) GS PAN Landsat 8 images in the Land Parcel A.

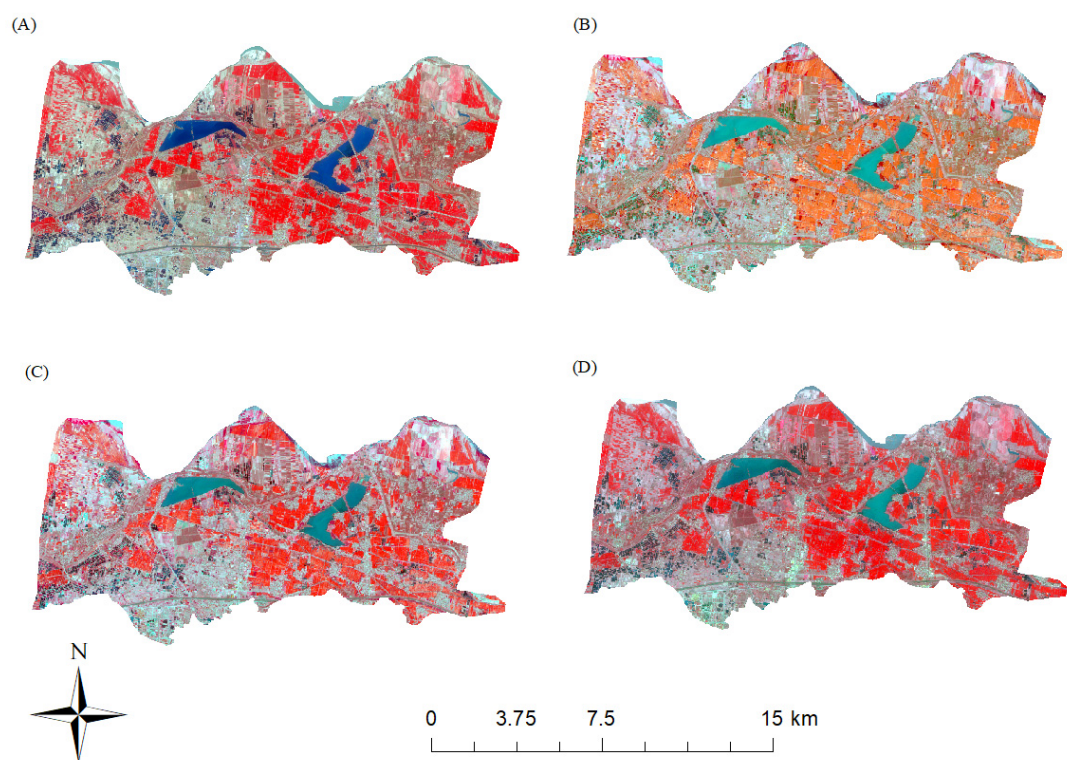

Figure S3. Remote sensing images of (A) MS Sentinel 2, (B) Brovey fused Sentinel 2-Landsat 8, (C) IHS fused Sentinel 2-Landsat 8 and (D) GS fused Sentinel 2-Landsat 8 in the study area.



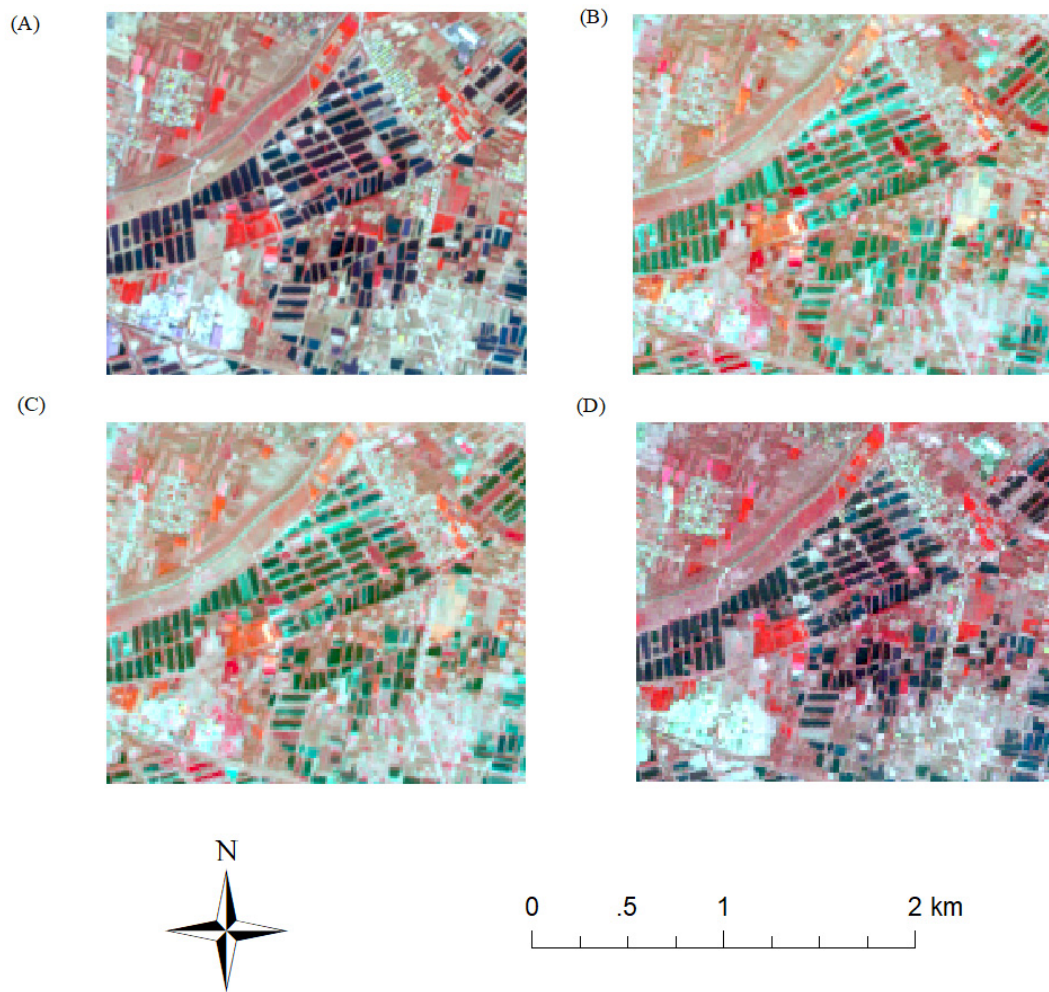

Figure S4. Remote sensing images of (A) MS Sentinel 2, (B) Brovey fused Sentinel 2-Landsat 8, (C) IHS fused Sentinel 2-Landsat 8 and (D) GS fused Sentinel 2-Landsat 8 in Land Parcel A.

## Reference

1. Rouse, J.W. Monitoring Vegetation Systems in the Great Plains with ERTS.; January 1 1974.
2. Xu, Y.; Wang, X.; Bai, J.; Wang, D.; Wang, W.; Guan, Y. Estimating the Spatial Distribution of Soil Total Nitrogen and Available Potassium in Coastal Wetland Soils in the Yellow River Delta by Incorporating Multi-Source Data. *Ecol. Indic.* **2020**, *111*, 106002, doi:10.1016/j.ecolind.2019.106002.
3. Frampton, W.J.; Dash, J.; Watmough, G.; Milton, E.J. Evaluating the Capabilities of Sentinel-2 for Quantitative Estimation of Biophysical Variables in Vegetation. *ISPRS J. Photogramm. Remote Sens.* **2013**, *82*, 83–92, doi:10.1016/j.isprsjprs.2013.04.007.
4. Gitelson, A.A.; Viña, A.; Ciganda, V.; Rundquist, D.C.; Arkebauer, T.J. Remote Estimation of Canopy Chlorophyll Content in Crops. *Geophys. Res. Lett.* **2005**, *32*, doi:10.1029/2005GL022688.
5. Daughtry, C.S.T.; Walthall, C.L.; Kim, M.S.; de Colstoun, E.B.; McMurtrey, J.E. Estimating Corn Leaf Chlorophyll Concentration from Leaf and Canopy Reflectance. *Remote Sens. Environ.* **2000**, *74*, 229–239, doi:10.1016/S0034-4257(00)00113-9.
6. Haboudane, D.; Miller, J.R.; Tremblay, N.; Zarco-Tejada, P.J.; Dextraze, L. Integrated Narrow-Band Vegetation Indices for Prediction of Crop Chlorophyll Content for Application to Precision Agriculture. *Remote Sens. Environ.* **2002**, *81*, 416–426, doi:10.1016/S0034-4257(02)00018-4.
7. Rogers, A.S.; Kearney, M.S. Reducing Signature Variability in Unmixing Coastal Marsh Thematic Mapper Scenes Using Spectral Indices. *Int. J. Remote Sens.* **2004**, *25*, 2317–2335, doi:10.1080/01431160310001618103.
8. Gao, B. NDWI—A Normalized Difference Water Index for Remote Sensing of Vegetation Liquid Water from Space. *Remote Sens. Environ.* **1996**, *58*, 257–266, doi:10.1016/S0034-4257(96)00067-3.
9. Rock, B.N.; Vogelmann, J.E.; Williams, D.L.; Vogelmann, A.F.; Hoshizaki, T. Remote Detection of Forest DamagePlant Responses to Stress May Have Spectral “Signatures” That Could Be Used to Map, Monitor, and Measure Forest Damage. *BioScience* **1986**, *36*, 439–445, doi:10.2307/1310339.
10. Musick, H.B.; Pelletier, R.E. Response to Soil Moisture of Spectral Indexes Derived from Bidirectional Reflectance in Thematic Mapper Wavebands. *Remote Sens. Environ.* **1988**, *25*, 167–184, doi:10.1016/0034-4257(88)90099-5.
11. Allbed, A.; Kumar, L.; Aldakheel, Y.Y. Assessing Soil Salinity Using Soil Salinity and Vegetation Indices Derived from IKONOS High-Spatial Resolution Imageries: Applications in a Date Palm Dominated Region. *Geoderma* **2014**, *230–231*, 1–8, doi:10.1016/j.geoderma.2014.03.025.
12. Gorji, T.; Sertel, E.; Tanik, A. Monitoring Soil Salinity via Remote Sensing Technology under Data Scarce Conditions: A Case Study from Turkey. *Ecol. Indic.* **2017**, *74*, 384–391, doi:10.1016/j.ecolind.2016.11.043.
